# Supplementary material
Source: PubMed Central journal article supplement (PMC5001616)
Supplement: supp_gkw592_nar-02140-v-2015-File008.pdf [file supp_gkw592_nar-02140-v-2015-File008.pdf]

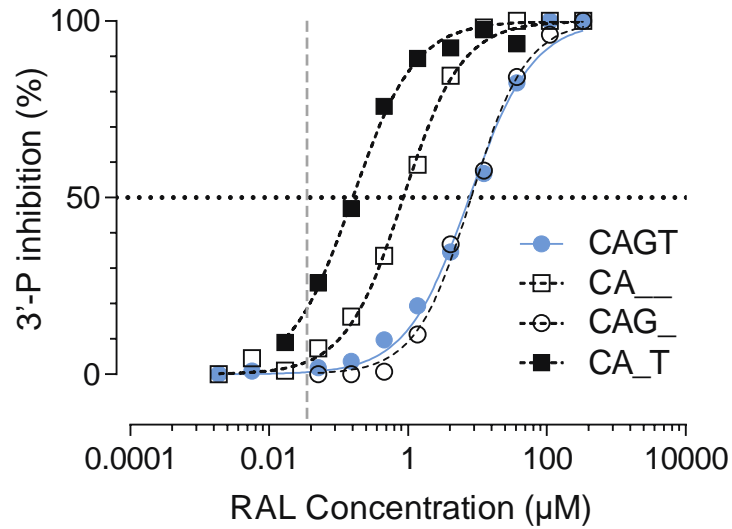

*Supplemental Figure 1. Role of the +1 and +2 bases in RAL inhibition of 3'-P.* The oligonucleotides with abasic sites at the indicated positions were used as substrates in 3'-P assays. Reactions were performed with recombinant WT IN for 120 minutes with increasing concentrations of RAL. For comparison, the vertical dashed line represents the IC<sub>50</sub> value for ST inhibition by RAL. Data points and fitted curves are from a single representative experiment.

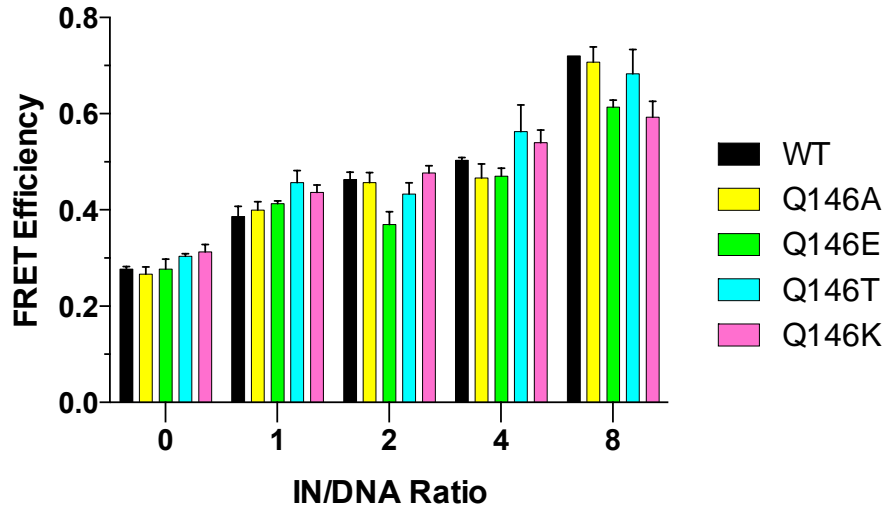

*Supplemental Figure 2. FRET efficiency of the Cy3/Cy5 labeled dsDNA oligomer in presence of WT HIV IN and the Q146A, Q146E, Q146T, and Q146K mutants. The FRET efficiency was determined as  $E_{\text{FRET}} = 1 - F_{\text{DA}}/F_{\text{D}}$  by measuring the donor (Cy3) fluorescence intensity in absence ( $F_{\text{D}}$ ) and presence ( $F_{\text{DA}}$ ) of the acceptor (Cy5) at different IN/DNA concentration ratios.*

Interactions of HIV IN with the double stranded substrate were monitored by FRET. The substrate oligomer Cy5-22t/Cy3-22b (Cyanine5 (Cy5) dye 5'-end labeled top strand, 5'-Cy5-AGTGTGGAAAATCTCTAGCAGT was annealed to a fully complementary Cyanine3 (Cy3) dye 5'-end labeled bottom strand, 5'-Cy3-ACTGCTAGAGATTTTCCACACT). This dsDNA was incubated at a concentration of 63 nM with IN at 63, 125, 250 and 500 nM in buffer containing 50 mM 3-(N-morpholino)propanesulfonic acid (MOPS) pH 7.2, 7.5 mM MnCl<sub>2</sub>, 14 mM 2-mercaptoethanol. The reaction mixtures (150 μL) were prepared on ice and, after incubation for 3 min, the fluorescence intensity was measured three times at 1 min intervals on EnVision 2104 Multilabel Reader (PerkinElmer) at 579 nm (Cy3 dye emission) and 685 (Cy5 dye emission) with excitation at 531 nm (Cy3). FRET efficiency was calculated as  $E_{\text{FRET}} = 1 - F_{\text{DA}}/F_{\text{D}}$ , where  $F_{\text{DA}}$  is the fluorescence of the donor in absence of the acceptor and  $F_{\text{D}}$  is measured in the absence of the acceptor.

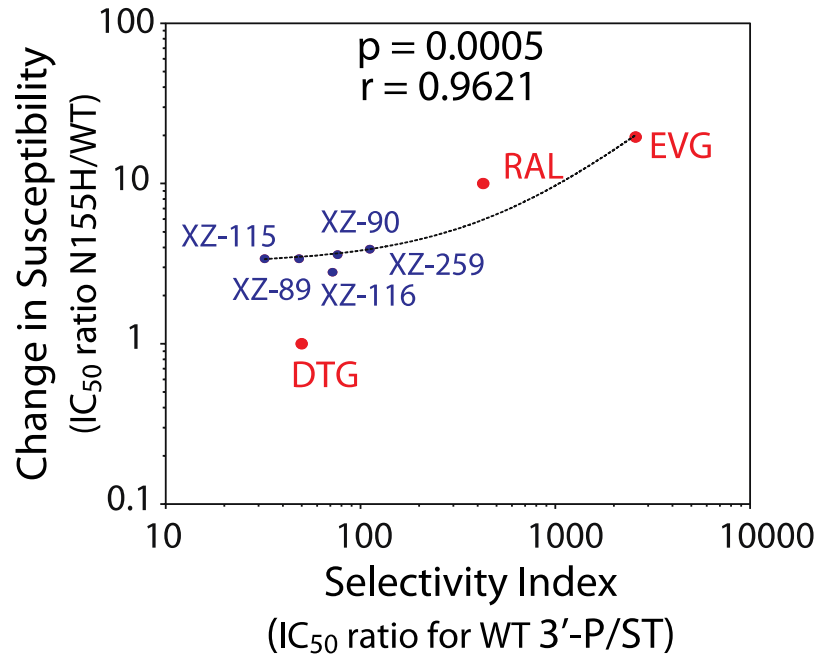

*Supplemental Figure 3. Correlation between the selectivity of a molecule for ST over 3'-P and the change in susceptibility induced by the N155H resistant mutant. The plot was generated as in Figure 7.*

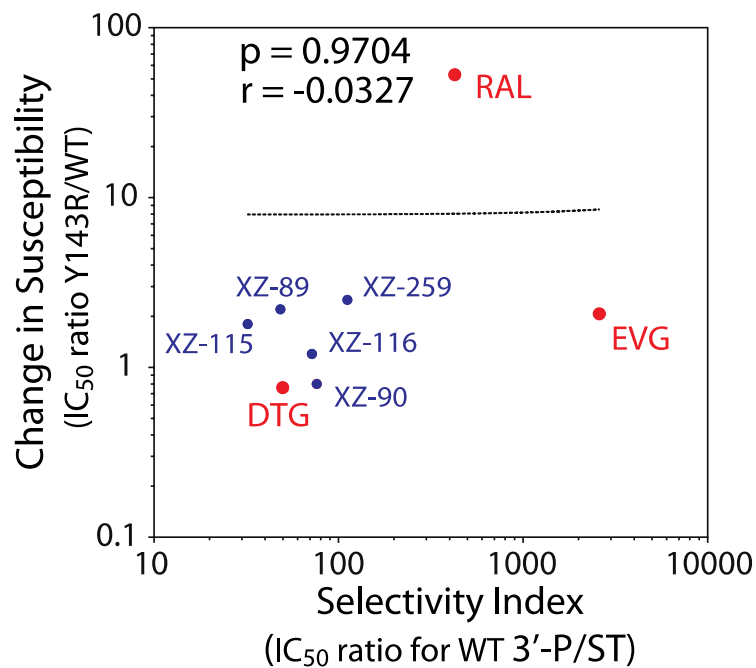

*Supplemental Figure 4. Lack of correlation between the selectivity of a molecule for ST over 3'-P and the change in susceptibility induced by the RAL specific mutant Y143R. The plot was generated as in Figure 6.*
